# Supplementary material for: Systematic Review on the Applicability of Principal Component Analysis for the Study of Movement in the Older Adult Population
Source: MDPI journal article supplement (doi:10.3390/s23010205), 2022-12-25
Supplement: s1 [file s1]

# Systematic Review on the Applicability of Principal Component Analysis for the Study of Movement in the Older Adult Population

Juliana Moreira <sup>1,2</sup>, Bruno Silva <sup>3</sup>, Hugo Faria <sup>3</sup>, Rubim Santos <sup>4</sup> and Andreia S. P. Sousa <sup>1,\*</sup>

## Database search - Scopus

| Search history                                                                                                                                                                                                                                                                                                                                                                                                                                                                                                                     | Combine queries... | e.g. #1 AND NOT #3         | 🔍 ⓘ     |
|------------------------------------------------------------------------------------------------------------------------------------------------------------------------------------------------------------------------------------------------------------------------------------------------------------------------------------------------------------------------------------------------------------------------------------------------------------------------------------------------------------------------------------|--------------------|----------------------------|---------|
| 18 (( TITLE-ABS-KEY ("aged" OR "elder*" OR "older adult*" OR "aged, 80 and over" OR "older person*" OR "centenarian" OR "sexagenarian*" OR "septuagenarian*" OR "octogenarian*" OR "nonagenarian*")) AND ( TITLE-ABS-KEY ("Movement" OR "Musculoskeletal Physiological Phenomena" OR "Biomechanical Phenomena" OR "biomechanics" OR "movement evaluation" OR "Task Performance and Analysis" OR "task" OR "gait" OR "sit-to-stand" OR "Stair Climbing" OR "Walking" OR "kinetic*" OR "Exercise Test"))) AND ( TITLE-ABS-KEY...     |                    | 311 document results       | 🔔 📄 ✎ 🗑 |
| 17 (( TITLE-ABS-KEY ("aged" OR "elder*" OR "older adult*" OR "aged, 80 and over" OR "older person*" OR "centenarian" OR "sexagenarian*" OR "septuagenarian*" OR "octogenarian*" OR "nonagenarian*")) AND ( TITLE-ABS-KEY ("Movement" OR "Musculoskeletal Physiological Phenomena" OR "Biomechanical Phenomena" OR "biomechanics" OR "movement evaluation" OR "Task Performance and Analysis" OR "task" OR "gait" OR "sit-to-stand" OR "Stair Climbing" OR "Walking" OR "kinetic*" OR "Exercise Test"))) AND ( TITLE-ABS-KEY...     |                    | 322 document results       | 🔔 📄 ✎ 🗑 |
| 16 ( TITLE-ABS-KEY ( "randomized controlled trial" OR "controlled clinical trial" OR "clinical trial" OR "systematic review" OR "meta-analysis" ) )                                                                                                                                                                                                                                                                                                                                                                                |                    | 2,398,186 document results | 🔔 📄 ✎ 🗑 |
| 15 ( TITLE-ABS-KEY ( "aged" OR "elder*" OR "older adult*" OR "aged, 80 and over" OR "older person*" OR "centenarian" OR "sexagenarian*" OR "septuagenarian*" OR "octogenarian*" OR "nonagenarian*")) AND ( TITLE-ABS-KEY ( "Movement" OR "Musculoskeletal Physiological Phenomena" OR "Biomechanical Phenomena" OR "biomechanics" OR "movement evaluation" OR "Task Performance and Analysis" OR "task" OR "gait" OR "sit-to-stand" OR "Stair Climbing" OR "Walking" OR "kinetic*" OR "Exercise Test" ) ) ) AND ( TITLE-ABS-KEY... |                    | 359 document results       | 🔔 📄 ✎ 🗑 |
| 14 TITLE-ABS-KEY ( "Principal Component Analysis" OR "PCA" )                                                                                                                                                                                                                                                                                                                                                                                                                                                                       |                    | 255,172 document results   | 🔔 📄 ✎ 🗑 |
| 13 TITLE-ABS-KEY ( "Movement" OR "Musculoskeletal Physiological Phenomena" OR "Biomechanical Phenomena" OR "biomechanics" OR "movement evaluation" OR "Task Performance and Analysis" OR "task" OR "gait" OR "sit-to-stand" OR "Stair Climbing" OR "Walking" OR "kinetic*" OR "Exercise Test" )                                                                                                                                                                                                                                    |                    | 206,049 document results   | 🔔 📄 ✎ 🗑 |
| 12 TITLE-ABS-KEY ( "aged" OR "elder*" OR "older adult*" OR "aged, 80 and over" OR "older person*" OR "centenarian" OR "sexagenarian*" OR "septuagenarian*" OR "octogenarian*" OR "nonagenarian*" )                                                                                                                                                                                                                                                                                                                                 |                    | 6,010,627 document results | 🔔 📄 ✎ 🗑 |
| Showing all recent searches   <a href="#">View 5 most recent only</a>                                                                                                                                                                                                                                                                                                                                                                                                                                                              |                    |                            |         |
| <a href="#">^ Top of page</a>                                                                                                                                                                                                                                                                                                                                                                                                                                                                                                      |                    |                            |         |

Figure S1: Specific search algorithm for Scopus

## Database search - Web of Science

|                          |   |                                                                                                                                                                                                                                                                               |           |                                |                   |                   |                   |
|--------------------------|---|-------------------------------------------------------------------------------------------------------------------------------------------------------------------------------------------------------------------------------------------------------------------------------|-----------|--------------------------------|-------------------|-------------------|-------------------|
| <input type="checkbox"/> | 7 | #4 NOT #5 and 2022 or 2021 or 2020 or 2019 or 2018 or 2017 or 2016 or 2015 or 2014 or 2013 or 2012 or 2011 or 2010 or 2009 or 2008 or 2007 or 2006 or 2005 or 2004 or 2003 or 2002 (Publication Years)                                                                        | 228       | <a href="#">Add to query</a> ▾ | <a href="#">↔</a> | <a href="#">✎</a> | <a href="#">🔔</a> |
| <input type="checkbox"/> | 6 | #4 NOT #5                                                                                                                                                                                                                                                                     | 245       | <a href="#">Add to query</a> ▾ | <a href="#">↔</a> | <a href="#">✎</a> | <a href="#">🔔</a> |
| <input type="checkbox"/> | 5 | TS=(("randomized controlled trial" OR "controlled clinical trial" OR "clinical trial" OR "systematic review" OR "meta-analysis"))                                                                                                                                             | 758,491   | <a href="#">Add to query</a> ▾ | <a href="#">↔</a> | <a href="#">✎</a> | <a href="#">🔔</a> |
| <input type="checkbox"/> | 4 | #1 AND #2 AND #3                                                                                                                                                                                                                                                              | 254       | <a href="#">Add to query</a> ▾ | <a href="#">↔</a> | <a href="#">✎</a> | <a href="#">🔔</a> |
| <input type="checkbox"/> | 3 | TS=(("Principal Component Analysis" OR "PCA"))                                                                                                                                                                                                                                | 166,672   | <a href="#">Add to query</a> ▾ | <a href="#">↔</a> | <a href="#">✎</a> | <a href="#">🔔</a> |
| <input type="checkbox"/> | 2 | TS=(("Movement" OR "Musculoskeletal Physiological Phenomena" OR "Biomechanical Phenomena" "biomechanics" OR "movement evaluation" OR "Task Performance and Analysis" OR "task" OR "gait" OR "sit-to-stand" OR "Stair Climbing" OR "Walking" OR "kinetic" OR "Exercise Test")) | 2,725,781 | <a href="#">Add to query</a> ▾ | <a href="#">↔</a> | <a href="#">✎</a> | <a href="#">🔔</a> |
| <input type="checkbox"/> | 1 | TS=(("aged" OR "elder*" OR "older adult" OR "older person*" OR "aged, 80 and over" OR "centenarian*" OR "sexagenarian*" OR "septuagenarian*" OR "octogenarian*" OR "nonagenarian*").)                                                                                         | 1,007,230 | <a href="#">Add to query</a> ▾ | <a href="#">↔</a> | <a href="#">✎</a> | <a href="#">🔔</a> |

**Figure S2:** Specific search algorithm for Web of Science

## Database search - PubMed

| Search | Actions | Details | Query                                                                                                                                                                                                                                                                                                                                                                                                                                                                                                                                                                                                                                                                                                                                                                                                                                                                                                                                                                                                                           | Results   | Time     |
|--------|---------|---------|---------------------------------------------------------------------------------------------------------------------------------------------------------------------------------------------------------------------------------------------------------------------------------------------------------------------------------------------------------------------------------------------------------------------------------------------------------------------------------------------------------------------------------------------------------------------------------------------------------------------------------------------------------------------------------------------------------------------------------------------------------------------------------------------------------------------------------------------------------------------------------------------------------------------------------------------------------------------------------------------------------------------------------|-----------|----------|
| #11    | ...     | >       | Search: #4 NOT #5 Filters: from 2002 - 2022                                                                                                                                                                                                                                                                                                                                                                                                                                                                                                                                                                                                                                                                                                                                                                                                                                                                                                                                                                                     | 1,146     | 06:32:14 |
| #7     | ...     | >       | Search: #4 NOT #5 Filters: from 2000 - 2022                                                                                                                                                                                                                                                                                                                                                                                                                                                                                                                                                                                                                                                                                                                                                                                                                                                                                                                                                                                     | 1,166     | 05:53:50 |
| #10    | ...     | >       | Search: #9 AND #2 AND #3                                                                                                                                                                                                                                                                                                                                                                                                                                                                                                                                                                                                                                                                                                                                                                                                                                                                                                                                                                                                        | 37        | 05:51:18 |
| #9     | ...     | >       | Search: #1 AND #8                                                                                                                                                                                                                                                                                                                                                                                                                                                                                                                                                                                                                                                                                                                                                                                                                                                                                                                                                                                                               | 31,824    | 05:50:52 |
| #8     | ...     | >       | Search: ("independent living"[MeSH Terms] OR "independent living"[Title/Abstract] OR "community dwelling"[Title/Abstract] OR "community-dwellers"[Title/Abstract] OR "community living"[Title/Abstract] OR "aging in place"[Title/Abstract])                                                                                                                                                                                                                                                                                                                                                                                                                                                                                                                                                                                                                                                                                                                                                                                    | 37,458    | 05:50:30 |
| #6     | ...     | >       | Search: #4 NOT #5                                                                                                                                                                                                                                                                                                                                                                                                                                                                                                                                                                                                                                                                                                                                                                                                                                                                                                                                                                                                               | 1,266     | 05:37:30 |
| #5     | ...     | >       | Search: ("randomized controlled trial"[Publication Type] OR "randomized controlled trials as topic"[MeSH Terms] OR "randomized controlled trial"[Title/Abstract] OR "clinical trial"[Publication Type] OR "clinical trial"[Title/Abstract] OR "controlled clinical trial"[Publication Type] OR "controlled clinical trials as topic"[MeSH Terms] OR "controlled clinical trial"[Title/Abstract] OR "Comment"[Publication Type] OR "Letter"[Publication Type] OR "correspondence as topic"[MeSH Terms] OR "Editorial"[Publication Type] OR "Review"[Publication Type] OR "review literature as topic"[MeSH Terms] OR "Systematic review"[Publication Type] OR "Systematic reviews as topic"[MeSH Terms] OR "systematic review"[Title/Abstract] OR "Meta-Analysis"[Publication Type] OR "Meta analysis as Topic"[MeSH Terms] OR "Meta analysis"[Title/Abstract] OR "Meta-analysis as Topic"[MeSH Terms] OR "Guideline"[Publication Type] OR "Practice Guideline"[Publication Type] OR "Practice Guidelines as Topic"[MeSH Terms]) | 6,344,627 | 05:36:37 |
| #4     | ...     | >       | Search: #1 AND #2 AND #3                                                                                                                                                                                                                                                                                                                                                                                                                                                                                                                                                                                                                                                                                                                                                                                                                                                                                                                                                                                                        | 1,502     | 05:33:58 |
| #3     | ...     | >       | Search: ("Principal Component Analysis"[MeSH Terms] OR "Principal Component Analysis"[Title/Abstract] OR "PCA"[Title/Abstract])                                                                                                                                                                                                                                                                                                                                                                                                                                                                                                                                                                                                                                                                                                                                                                                                                                                                                                 | 92,033    | 05:33:22 |
| #2     | ...     | >       | Search: ("Movement"[MeSH Terms] OR "Movement"[Title/Abstract] OR "Musculoskeletal Physiological Phenomena"[MeSH terms] OR "Musculoskeletal Physiological Phenomena"[Title/Abstract] OR "Biomechanical Phenomena"[MeSH Terms] OR "Biomechanical Phenomena"[Title/Abstract] OR "movement evaluation"[Title/Abstract] OR "kinematics"[Title/Abstract] OR "biomechanics"[Title/Abstract] OR "Task Performance and Analysis"[MeSH Terms] OR "Task Performance and Analysis"[Title/Abstract] OR "task"[Title/Abstract] OR "gait"[MeSH Terms] OR "gait"[Title/Abstract] OR "sit-to-stand"[Title/Abstract] OR "Kinetics"[MeSH Terms] OR "kinetic"[Title/Abstract] OR "Stair Climbing"[MeSH Terms] OR "Stair Climbing"[Title/Abstract] OR "Walking"[MeSH Terms] OR "Walking"[Title/Abstract] OR "Exercise Test"[MeSH Terms] OR "Exercise Test"[Title/Abstract])                                                                                                                                                                          | 2,598,220 | 05:31:42 |
| #1     | ...     | >       | Search: ("aged"[MeSH Terms] OR "aged"[Title/Abstract] OR "elder"[Title/Abstract] OR "older adult"[Title/Abstract] OR "aged, 80 and over"[MeSH Terms] OR "aged, 80 and over"[Title/Abstract] OR "older person"[Title/Abstract] OR "centenarian"[MeSH Terms] OR "centenarian"[Title/Abstract] OR "sexagenarian"[Title/Abstract] OR "septuagenarian"[Title/Abstract] OR "octogenarian"[MeSH Terms] OR "octogenarian"[Title/Abstract] OR "nonagenarian"[MeSH Terms] OR "nonagenarian"[Title/Abstract])                                                                                                                                                                                                                                                                                                                                                                                                                                                                                                                              | 3,922,024 | 05:26:00 |

Figure S3: Specific search algorithm for Pubmed
